# Supplementary material for: Mind Wandering Influences EEG Signal in Complex Multimodal Environments
Source: Front Neuroergon. 2021 Apr 1;2:625343. doi: 10.3389/fnrgo.2021.625343 (PMC10790857; doi:10.3389/fnrgo.2021.625343)
Supplement: Supplementary file 1 [file Data_Sheet_1.CSV]

Subject	RuntimeVersion	SessionStartDateTimeUtc	Block	Trial	AttentionalReport.OnsetTime	AttentionalReport.RESP	AttentionalReport.RT	Procedure[Trial]	Beep.OnsetTime	Beep.RESP	Beep.RT
1	2.0.10.356	29/05/2018 17:30	1	1	145005	2	2632	Set90	87778
1	2.0.10.356	29/05/2018 17:30	1	2	200857	2	2563	Set60	163673	{ENTER}	628
1	2.0.10.356	29/05/2018 17:30	1	3	313453	2	3054	Set120	229461	{ENTER}	823
1	2.0.10.356	29/05/2018 17:30	1	4	426209	3	2833	Set120	342553	{ENTER}	730
1	2.0.10.356	29/05/2018 17:30	1	5	482487	3	2307	Set60	445092	{ENTER}	846
1	2.0.10.356	29/05/2018 17:30	1	6	564950	3	2339	Set90	510833	{ENTER}	872
1	2.0.10.356	29/05/2018 17:30	1	7	677280	3	2272	Set120	593325	{ENTER}	652
1	2.0.10.356	29/05/2018 17:30	1	8	733424	3	1935	Set60	695597	{ENTER}	987
1	2.0.10.356	29/05/2018 17:30	2	9	815328	3	1710	Set90	761394	{ENTER}	853
1	2.0.10.356	29/05/2018 17:30	2	10	870099	2	2075	Set60	833079	{ENTER}	423
1	2.0.10.356	29/05/2018 17:30	2	11	982055	2	2446	Set120	898226	{ENTER}	532
1	2.0.10.356	29/05/2018 17:30	2	12	1094558	2	2670	Set120	1010542	{ENTER}	807
1	2.0.10.356	29/05/2018 17:30	2	13	1150689	4	2858	Set60	1113262	{ENTER}	814
1	2.0.10.356	29/05/2018 17:30	2	14	1233620	3	2030	Set90	1179571	{ENTER}	824
1	2.0.10.356	29/05/2018 17:30	2	15	1345536	2	2137	Set120	1261690	{ENTER}	536
1	2.0.10.356	29/05/2018 17:30	2	16	1401054	3	1859	Set60	1363726	{ENTER}	723
1	2.0.10.356	29/05/2018 17:30	3	17	1482611	1	1645	Set90	1428946	{ENTER}	679
1	2.0.10.356	29/05/2018 17:30	3	18	1537489	3	1471	Set60	1500290	{ENTER}	718
1	2.0.10.356	29/05/2018 17:30	3	19	1648618	3	1741	Set120	1565002	{ENTER}	629
1	2.0.10.356	29/05/2018 17:30	3	20	1760054	1	1976	Set120	1676391	{ENTER}	495
1	2.0.10.356	29/05/2018 17:30	3	21	1815172	3	1641	Set60	1778073	{ENTER}	580
1	2.0.10.356	29/05/2018 17:30	3	22	1897049	3	1419	Set90	1842884	{ENTER}	841
1	2.0.10.356	29/05/2018 17:30	3	23	2008605	2	2182	Set120	1924514	{ENTER}	898
1	2.0.10.356	29/05/2018 17:30	3	24	2063883	3	1664	Set60	2026834	{ENTER}	505
1	2.0.10.356	29/05/2018 17:30	4	25	2145240	3	1466	Set90	2091603	{ENTER}	575
1	2.0.10.356	29/05/2018 17:30	4	26	2200038	3	1403	Set60	2162739	{ENTER}	583
1	2.0.10.356	29/05/2018 17:30	4	27	2311501	1	1899	Set120	2227481	{ENTER}	704
1	2.0.10.356	29/05/2018 17:30	4	28	2423510	2	1993	Set120	2339445	{ENTER}	987
1	2.0.10.356	29/05/2018 17:30	4	29	2478801	3	2174	Set60	2441542	{ENTER}	617
1	2.0.10.356	29/05/2018 17:30	4	30	2560892	3	1682	Set90	2507015	{ENTER}	656
1	2.0.10.356	29/05/2018 17:30	4	31	2672168	3	1565	Set120	2588615	{ENTER}	479
1	2.0.10.356	29/05/2018 17:30	4	32	2727046	1	2199	Set60	2689768	{ENTER}	693
2	2.0.10.356	05/06/2018 16:24	1	1	197576	3	6500	Set90	143438	{ENTER}	774
2	2.0.10.356	05/06/2018 16:24	1	2	257801	2	2850	Set60	220104	{ENTER}	1012
2	2.0.10.356	05/06/2018 16:24	1	3	371050	3	5768	Set120	286705	{ENTER}	1042
2	2.0.10.356	05/06/2018 16:24	1	4	487192	3	2153	Set120	402861	{ENTER}	725
2	2.0.10.356	05/06/2018 16:24	1	5	542764	3	3037	Set60	505384	{ENTER}	897
2	2.0.10.356	05/06/2018 16:24	1	6	625961	2	2903	Set90	571839	{ENTER}	569
2	2.0.10.356	05/06/2018 16:24	1	7	739637	3	2594	Set120	654911	{ENTER}	793
2	2.0.10.356	05/06/2018 16:24	1	8	795675	1	1987	Set60	758261	{ENTER}	554
2	2.0.10.356	05/06/2018 16:24	2	9	879512	1	2909	Set90	823708	{ENTER}	618
2	2.0.10.356	05/06/2018 16:24	2	10	936003	1	1378	Set60	898456	{ENTER}	781
2	2.0.10.356	05/06/2018 16:24	2	11	1047812	2	7784	Set120	963410	{ENTER}	755
2	2.0.10.356	05/06/2018 16:24	2	12	1169475	1	1464	Set120	1081652	{ENTER}	1080
2	2.0.10.356	05/06/2018 16:24	2	13	1224406	3	4124	Set60	1186984	{ENTER}	699
2	2.0.10.356	05/06/2018 16:24	2	14	1309616	3	1641	Set90	1254563	{ENTER}	663
2	2.0.10.356	05/06/2018 16:24	2	15	1422226	3	1454	Set120	1337298	{ENTER}	679
2	2.0.10.356	05/06/2018 16:24	2	16	1477744	3	2144	Set60	1439724	{ENTER}	1340
2	2.0.10.356	05/06/2018 16:24	3	17	1560661	1	2050	Set90	1505925	{ENTER}	675
2	2.0.10.356	05/06/2018 16:24	3	18	1617192	3	3911	Set60	1578753	{ENTER}	1718
2	2.0.10.356	05/06/2018 16:24	3	19	1731214	3	2432	Set120	1647149	{ENTER}	713
2	2.0.10.356	05/06/2018 16:24	3	20	1845370	3	1530	Set120	1759680	{ENTER}	1205
2	2.0.10.356	05/06/2018 16:24	3	21	1900715	3	1329	Set60	1862943	{ENTER}	1125
2	2.0.10.356	05/06/2018 16:24	3	22	1981859	1	1960	Set90	1928090	{ENTER}	554
2	2.0.10.356	05/06/2018 16:24	3	23	2094375	1	1923	Set120	2009860	{ENTER}	679
2	2.0.10.356	05/06/2018 16:24	3	24	2150213	3	4061	Set60	2112332	{ENTER}	542
2	2.0.10.356	05/06/2018 16:24	4	25	2233943	1	1274	Set90	2180306	{ENTER}	511
2	2.0.10.356	05/06/2018 16:24	4	26	2289354	1	1134	Set60	2251251	{ENTER}	1454
2	2.0.10.356	05/06/2018 16:24	4	27	2402537	3	2222	Set120	2316521	{ENTER}	1127
2	2.0.10.356	05/06/2018 16:24	4	28	2515773	1	1129	Set120	2430813	{ENTER}	938
2	2.0.10.356	05/06/2018 16:24	4	29	2570438	3	1752	Set60	2532948	{ENTER}	730
2	2.0.10.356	05/06/2018 16:24	4	30	2653501	1	2600	Set90	2598222	{ENTER}	943
2	2.0.10.356	05/06/2018 16:24	4	31	2767057	2	4843	Set120	2682142	{ENTER}	943
2	2.0.10.356	05/06/2018 16:24	4	32	2826268	2	2607	Set60	2787941	{ENTER}	1503
3	2.0.10.356	07/06/2018 07:59	1	1	124667	1	1616	Set90	70860	{ENTER}	696
3	2.0.10.356	07/06/2018 07:59	1	2	180132	2	2303	Set60	142329	{ENTER}	1266
3	2.0.10.356	07/06/2018 07:59	1	3	292954	1	1576	Set120	208506	{ENTER}	1096
3	2.0.10.356	07/06/2018 07:59	1	4	408137	1	1615	Set120	320591	{ENTER}	506
3	2.0.10.356	07/06/2018 07:59	1	5	462908	1	1460	Set60	425814	{ENTER}	634
3	2.0.10.356	07/06/2018 07:59	1	6	544532	2	2795	Set90	490397	{ENTER}	643
3	2.0.10.356	07/06/2018 07:59	1	7	657355	1	3555	Set120	573380	{ENTER}	739
3	2.0.10.356	07/06/2018 07:59	1	8	715259	3	2995	Set60	676965	{ENTER}	1569
3	2.0.10.356	07/06/2018 07:59	2	9	798323	2	2274	Set90	744310	{ENTER}	607
3	2.0.10.356	07/06/2018 07:59	2	10	854374	1	2198	Set60	816625	{ENTER}	956
3	2.0.10.356	07/06/2018 07:59	2	11	966664	2	3283	Set120	882623	{ENTER}	597
3	2.0.10.356	07/06/2018 07:59	2	12	1080153	2	2401	Set120	995987	{ENTER}	768
3	2.0.10.356	07/06/2018 07:59	2	13	1136364	1	1742	Set60	1098631	{ENTER}	1123
3	2.0.10.356	07/06/2018 07:59	2	14	1218042	3	2271	Set90	1164152	{ENTER}	593
3	2.0.10.356	07/06/2018 07:59	2	15	1331384	3	1864	Set120	1246364	{ENTER}	1085
3	2.0.10.356	07/06/2018 07:59	2	16	1387182	1	1681	Set60	1349304	{ENTER}	1216
3	2.0.10.356	07/06/2018 07:59	3	17	1469739	1	2780	Set90	1414903	{ENTER}	752
3	2.0.10.356	07/06/2018 07:59	3	18	1525924	2	2498	Set60	1488568	{ENTER}	686
3	2.0.10.356	07/06/2018 07:59	3	19	1638346	1	1427	Set120	1554458	{ENTER}	636
3	2.0.10.356	07/06/2018 07:59	3	20	1750089	1	1475	Set120	1665828	{ENTER}	721
3	2.0.10.356	07/06/2018 07:59	3	21	1805540	1	1311	Set60	1767633	{ENTER}	1195
3	2.0.10.356	07/06/2018 07:59	3	22	1887058	1	2569	Set90	1832890	{ENTER}	609
3	2.0.10.356	07/06/2018 07:59	3	23	1999667	1	1431	Set120	1915678	{ENTER}	804
3	2.0.10.356	07/06/2018 07:59	3	24	2054465	1	1320	Set60	2017169	{ENTER}	688
3	2.0.10.356	07/06/2018 07:59	4	25	2136689	2	1959	Set90	2081835	{ENTER}	1750
3	2.0.10.356	07/06/2018 07:59	4	26	2192367	1	1801	Set60	2154698	{ENTER}	1030
3	2.0.10.356	07/06/2018 07:59	4	27	2304562	1	1405	Set120	2220220	{ENTER}	1196
3	2.0.10.356	07/06/2018 07:59	4	28	2417052	3	2466	Set120	2332034	{ENTER}	596
3	2.0.10.356	07/06/2018 07:59	4	29	2473650	1	1363	Set60	2435597	{ENTER}	1201
3	2.0.10.356	07/06/2018 07:59	4	30	2555607	1	1117	Set90	2501045	{ENTER}	1240
3	2.0.10.356	07/06/2018 07:59	4	31	2667016	1	1099	Set120	2582760	{ENTER}	980
3	2.0.10.356	07/06/2018 07:59	4	32	2722027	1	1752	Set60	2684179	{ENTER}	936
4	2.0.10.356	12/06/2018 08:11	1	1	105842	1	1498	Set90	51834	{ENTER}	779
4	2.0.10.356	12/06/2018 08:11	1	2	160773	2	1399	Set60	123386	{ENTER}	690
4	2.0.10.356	12/06/2018 08:11	1	3	272116	3	2271	Set120	188223	{ENTER}	453
4	2.0.10.356	12/06/2018 08:11	1	4	384299	1	1559	Set120	300445	{ENTER}	470
4	2.0.10.356	12/06/2018 08:11	1	5	439230	1	1427	Set60	401924	{ENTER}	686
4	2.0.10.356	12/06/2018 08:11	1	6	520680	1	1504	Set90	466696	{ENTER}	753
4	2.0.10.356	12/06/2018 08:11	1	7	632183	2	1528	Set120	548232	{ENTER}	712
4	2.0.10.356	12/06/2018 08:11	1	8	687021	2	1682	Set60	649761	{ENTER}	702
4	2.0.10.356	12/06/2018 08:11	2	9	768152	2	1550	Set90	714749	{ENTER}	402
4	2.0.10.356	12/06/2018 08:11	2	10	822936	3	1670	Set60	785737	{ENTER}	661
4	2.0.10.356	12/06/2018 08:11	2	11	935226	1	1387	Set120	850643	{ENTER}	730
4	2.0.10.356	12/06/2018 08:11	2	12	1046528	1	1283	Set120	962695	{ENTER}	629
4	2.0.10.356	12/06/2018 08:11	2	13	1101380	3	1487	Set60	1063860	{ENTER}	735
4	2.0.10.356	12/06/2018 08:11	2	14	1182630	3	1444	Set90	1128900	{ENTER}	583
4	2.0.10.356	12/06/2018 08:11	2	15	1293586	1	1503	Set120	1210106	{ENTER}	424
4	2.0.10.356	12/06/2018 08:11	2	16	1348344	2	1417	Set60	1311147	{ENTER}	550
4	2.0.10.356	12/06/2018 08:11	3	17	1429915	3	1293	Set90	1375798	{ENTER}	650
4	2.0.10.356	12/06/2018 08:11	3	18	1484566	1	1169	Set60	1447263	{ENTER}	681
4	2.0.10.356	12/06/2018 08:11	3	19	1595335	2	1039	Set120	1511779	{ENTER}	516
4	2.0.10.356	12/06/2018 08:11	3	20	1707051	2	970	Set120	1622446	{ENTER}	672
4	2.0.10.356	12/06/2018 08:11	3	21	1761316	2	825	Set60	1724083	{ENTER}	706
4	2.0.10.356	12/06/2018 08:11	3	22	1842086	2	1190	Set90	1788180	{ENTER}	497
4	2.0.10.356	12/06/2018 08:11	3	23	1952962	1	913	Set120	1869314	{ENTER}	498
4	2.0.10.356	12/06/2018 08:11	3	24	2006880	1	1435	Set60	1969926	{ENTER}	589
4	2.0.10.356	12/06/2018 08:11	4	25	2088317	2	1549	Set90	2034361	{ENTER}	601
4	2.0.10.356	12/06/2018 08:11	4	26	2143249	2	1328	Set60	2105892	{ENTER}	750
4	2.0.10.356	12/06/2018 08:11	4	27	2254152	1	848	Set120	2170629	{ENTER}	556
4	2.0.10.356	12/06/2018 08:11	4	28	2364881	2	1102	Set120	2281090	{ENTER}	606
4	2.0.10.356	12/06/2018 08:11	4	29	2419212	2	931	Set60	2382059	{ENTER}	572
4	2.0.10.356	12/06/2018 08:11	4	30	2499743	2	951	Set90	2446188	{ENTER}	506
4	2.0.10.356	12/06/2018 08:11	4	31	2611045	1	1144	Set120	2526734	{ENTER}	528
4	2.0.10.356	12/06/2018 08:11	4	32	2665470	2	1286	Set60	2628267	{ENTER}	650
5	2.0.10.356	12/06/2018 11:37	1	1	102199	2	2855	Set90	48828	{ENTER}	418
5	2.0.10.356	12/06/2018 11:37	1	2	157983	1	4846	Set60	121116	{ENTER}	482
5	2.0.10.356	12/06/2018 11:37	1	3	272006	3	2622	Set120	188890	{ENTER}	499
5	2.0.10.356	12/06/2018 11:37	1	4	383948	1	3383	Set120	300710	{ENTER}	494
5	2.0.10.356	12/06/2018 11:37	1	5	440146	1	2401	Set60	403418	{ENTER}	385
5	2.0.10.356	12/06/2018 11:37	1	6	521664	1	4834	Set90	468599	{ENTER}	396
5	2.0.10.356	12/06/2018 11:37	1	7	635526	1	4923	Set120	552559	{ENTER}	347
5	2.0.10.356	12/06/2018 11:37	1	8	693284	2	2772	Set60	656509	{ENTER}	356
5	2.0.10.356	12/06/2018 11:37	2	9	775134	3	4610	Set90	722106	{ENTER}	310
5	2.0.10.356	12/06/2018 11:37	2	10	832546	1	2581	Set60	795786	{ENTER}	341
5	2.0.10.356	12/06/2018 11:37	2	11	944248	2	2502	Set120	861175	{ENTER}	480
5	2.0.10.356	12/06/2018 11:37	2	12	1055818	1	1739	Set120	972798	{ENTER}	456
5	2.0.10.356	12/06/2018 11:37	2	13	1110496	3	2644	Set60	1073641	{ENTER}	348
5	2.0.10.356	12/06/2018 11:37	2	14	1192133	3	3615	Set90	1139174	{ENTER}	326
5	2.0.10.356	12/06/2018 11:37	2	15	1305075	1	2088	Set120	1221789	{ENTER}	367
5	2.0.10.356	12/06/2018 11:37	2	16	1359900	3	3662	Set60	1323229	{ENTER}	325
5	2.0.10.356	12/06/2018 11:37	3	17	1444350	1	2275	Set90	1389614	{ENTER}	572
5	2.0.10.356	12/06/2018 11:37	3	18	1499428	1	2149	Set60	1462676	{ENTER}	445
5	2.0.10.356	12/06/2018 11:37	3	19	1610691	3	2965	Set120	1527615	{ENTER}	434
5	2.0.10.356	12/06/2018 11:37	3	20	1722794	1	2133	Set120	1639698	{ENTER}	342
5	2.0.10.356	12/06/2018 11:37	3	21	1777619	1	2187	Set60	1741003	{ENTER}	340
5	2.0.10.356	12/06/2018 11:37	3	22	1859149	2	1808	Set90	1805843	{ENTER}	531
5	2.0.10.356	12/06/2018 11:37	3	23	1969318	2	3110	Set120	1886993	{ENTER}	332
5	2.0.10.356	12/06/2018 11:37	3	24	2025356	3	2488	Set60	1988499	{ENTER}	553
5	2.0.10.356	12/06/2018 11:37	4	25	2107020	2	1783	Set90	2053877	{ENTER}	375
5	2.0.10.356	12/06/2018 11:37	4	26	2161671	3	2252	Set60	2124859	{ENTER}	368
5	2.0.10.356	12/06/2018 11:37	4	27	2267014	3	2708	Set120	2189974	{ENTER}	324
5	2.0.10.356	12/06/2018 11:37	4	28	2373957	1	2356	Set120	2295756	{ENTER}	373
5	2.0.10.356	12/06/2018 11:37	4	29	2427822	1	1618	Set60	2392360	{ENTER}	344
5	2.0.10.356	12/06/2018 11:37	4	30	2504966	1	2137	Set90	2455488	{ENTER}	416
5	2.0.10.356	12/06/2018 11:37	4	31	2614842	2	3116	Set120	2533140	{ENTER}	347
5	2.0.10.356	12/06/2018 11:37	4	32	2668227	3	2739	Set60	2633999	{ENTER}	391
6	2.0.10.356	12/07/2018 07:43	1	1	102820	1	2318	Set90	102071	{ENTER}	739
6	2.0.10.356	12/07/2018 07:43	1	2	166751	2	2522	Set60	166062	{ENTER}	675
6	2.0.10.356	12/07/2018 07:43	1	3	293573	1	1963	Set120	292935	{ENTER}	633
6	2.0.10.356	12/07/2018 07:43	1	4	417648	1	1887	Set120	417010	{ENTER}	629
6	2.0.10.356	12/07/2018 07:43	1	5	481246	1	1760	Set60	480435	{ENTER}	795
6	2.0.10.356	12/07/2018 07:43	1	6	575310	4	1983	Set90	574483	{ENTER}	810
6	2.0.10.356	12/07/2018 07:43	1	7	669826	4	1947	Set90	668938	{ENTER}	883
6	2.0.10.356	12/07/2018 07:43	1	8	764076	1	2000	Set90	763449	{ENTER}	611
6	2.0.10.356	12/07/2018 07:43	2	9	830167	1	1516	Set60	827335	{ENTER}	2828
6	2.0.10.356	12/07/2018 07:43	2	10	954069	4	3669	Set120	953445	{ENTER}	613
6	2.0.10.356	12/07/2018 07:43	2	11	1079825	4	1792	Set120	1079243	{ENTER}	566
6	2.0.10.356	12/07/2018 07:43	2	12	1143303	4	1537	Set60	1142461	{ENTER}	827
6	2.0.10.356	12/07/2018 07:43	2	13	1237339	4	2532	Set90	1236269	{ENTER}	1058
6	2.0.10.356	12/07/2018 07:43	2	14	1332256	4	1478	Set90	1331572	{ENTER}	674
6	2.0.10.356	12/07/2018 07:43	2	15	1427146	1	1939	Set90	1426067	{ENTER}	1074
6	2.0.10.356	12/07/2018 07:43	2	16	1490784	4	1901	Set60	1489945	{ENTER}	828
6	2.0.10.356	12/07/2018 07:43	3	17	1614699	4	1673	Set120	1613966	{ENTER}	718
6	2.0.10.356	12/07/2018 07:43	3	18	1738415	4	2228	Set120	1737829	{ENTER}	582
6	2.0.10.356	12/07/2018 07:43	3	19	1803386	1	1344	Set60	1801430	{ENTER}	1948
6	2.0.10.356	12/07/2018 07:43	3	20	1897516	1	1781	Set90	1896750	{ENTER}	755
6	2.0.10.356	12/07/2018 07:43	3	21	1991672	3	3016	Set90	1990646	{ENTER}	1010
6	2.0.10.356	12/07/2018 07:43	3	22	2087309	4	2202	Set90	2086349	{ENTER}	946
6	2.0.10.356	12/07/2018 07:43	3	23	2151160	1	1775	Set60	2150483	{ENTER}	660
6	2.0.10.356	12/07/2018 07:43	3	24	2275942	1	1847	Set120	2275032	{ENTER}	894
6	2.0.10.356	12/07/2018 07:43	4	25	2401111	4	2141	Set120	2400287	{ENTER}	813
6	2.0.10.356	12/07/2018 07:43	4	26	2464749	4	2143	Set60	2464056	{ENTER}	684
6	2.0.10.356	12/07/2018 07:43	4	27	2559279	3	1748	Set90	2558592	{ENTER}	675
6	2.0.10.356	12/07/2018 07:43	4	28	2652995	4	2055	Set90	2652439	{ENTER}	547
6	2.0.10.356	12/07/2018 07:43	4	29
6	2.0.10.356	12/07/2018 07:43	4	30
6	2.0.10.356	12/07/2018 07:43	4	31
6	2.0.10.356	12/07/2018 07:43	4	32
7	2.0.10.356	12/07/2018 11:23	1	1	246485	3	2744	Set90	245802	{ENTER}	667
7	2.0.10.356	12/07/2018 11:23	1	2	310749	2	1895	Set60	310041	{ENTER}	700
7	2.0.10.356	12/07/2018 11:23	1	3	434545	3	1442	Set120	433918	{ENTER}	621
7	2.0.10.356	12/07/2018 11:23	1	4	558314	1	1376	Set120	557333	{ENTER}	973
7	2.0.10.356	12/07/2018 11:23	1	5	620952	2	1378	Set60	620334	{ENTER}	604
7	2.0.10.356	12/07/2018 11:23	1	6	714868	1	1069	Set90	714198	{ENTER}	659
7	2.0.10.356	12/07/2018 11:23	1	7	808238	3	2338	Set90	807517	{ENTER}	715
7	2.0.10.356	12/07/2018 11:23	1	8	902701	3	1322	Set90	901964	{ENTER}	731
7	2.0.10.356	12/07/2018 11:23	2	9	965526	1	992	Set60	964723	{ENTER}	795
7	2.0.10.356	12/07/2018 11:23	2	10	1089268	3	1337	Set120	1088456	{ENTER}	797
7	2.0.10.356	12/07/2018 11:23	2	11	1212730	3	1042	Set120	1212007	{ENTER}	709
7	2.0.10.356	12/07/2018 11:23	2	12	1275448	3	923	Set60	1274712	{ENTER}	723
7	2.0.10.356	12/07/2018 11:23	2	13	1368805	2	1334	Set90	1367952	{ENTER}	843
7	2.0.10.356	12/07/2018 11:23	2	14	1462401	2	1137	Set90	1461671	{ENTER}	723
7	2.0.10.356	12/07/2018 11:23	2	15	1556385	3	1272	Set90	1555334	{ENTER}	1043
7	2.0.10.356	12/07/2018 11:23	2	16	1619063	1	969	Set60	1618413	{ENTER}	643
7	2.0.10.356	12/07/2018 11:23	3	17	1742551	3	1728	Set120	1741770	{ENTER}	773
7	2.0.10.356	12/07/2018 11:23	3	18	1866547	3	1075	Set120	1865681	{ENTER}	853
7	2.0.10.356	12/07/2018 11:23	3	19	1929571	3	1026	Set60	1928866	{ENTER}	699
7	2.0.10.356	12/07/2018 11:23	3	20	2022941	1	1423	Set90	2022130	{ENTER}	802
7	2.0.10.356	12/07/2018 11:23	3	21	2116565	1	1023	Set90	2115729	{ENTER}	827
7	2.0.10.356	12/07/2018 11:23	3	22	2209481	3	1194	Set90	2208912	{ENTER}	555
7	2.0.10.356	12/07/2018 11:23	3	23	2271839	3	1147	Set60	2271303	{ENTER}	531
7	2.0.10.356	12/07/2018 11:23	3	24	2395928	1	2049	Set120	2395068	{ENTER}	853
7	2.0.10.356	12/07/2018 11:23	4	25	2520177	3	1079	Set120	2519522	{ENTER}	638
7	2.0.10.356	12/07/2018 11:23	4	26	2583495	2	2112	Set60	2582748	{ENTER}	739
7	2.0.10.356	12/07/2018 11:23	4	27	2677731	3	1275	Set90	2677092	{ENTER}	626
7	2.0.10.356	12/07/2018 11:23	4	28	2771475	1	6570	Set90	2770395	{ENTER}	1074
7	2.0.10.356	12/07/2018 11:23	4
7	2.0.10.356	12/07/2018 11:23	4
7	2.0.10.356	12/07/2018 11:23	4
7	2.0.10.356	12/07/2018 11:23	4
8	2.0.10.356	12/07/2018 14:12	1	1	162647	1	5991	Set90	162172	{ENTER}	466
8	2.0.10.356	12/07/2018 14:12	1	2	230018	3	6348	Set60	229234	{ENTER}	772
8	2.0.10.356	12/07/2018 14:12	1	3	358534	1	3782	Set120	357887	{ENTER}	637
8	2.0.10.356	12/07/2018 14:12	1	4	484756	1	3975	Set120	484126	{ENTER}	613
8	2.0.10.356	12/07/2018 14:12	1	5	549727	1	5836	Set60	549151	{ENTER}	572
8	2.0.10.356	12/07/2018 14:12	1	6	648403	1	5239	Set90	647335	{ENTER}	1059
8	2.0.10.356	12/07/2018 14:12	1	7	776145	2	9815	Set120	775443	{ENTER}	693
8	2.0.10.356	12/07/2018 14:12	1	8	847463	1	4649	Set60	846868	{ENTER}	580
8	2.0.10.356	12/07/2018 14:12	2	9	944059	1	3988	Set90	943476	{ENTER}	571
8	2.0.10.356	12/07/2018 14:12	2	10	1009750	3	7904	Set60	1009091	{ENTER}	651
8	2.0.10.356	12/07/2018 14:12	2	11	1139812	3	3921	Set120	1139168	{ENTER}	637
8	2.0.10.356	12/07/2018 14:12	2	12	1268008	1	3188	Set120	1264999
8	2.0.10.356	12/07/2018 14:12	2	13	1333619	1	3296	Set60	1332888	{ENTER}	723
8	2.0.10.356	12/07/2018 14:12	2	14	1429242	2	4136	Set90	1428424	{ENTER}	810
8	2.0.10.356	12/07/2018 14:12	2	15	1555597	2	4476	Set120	1554900	{ENTER}	685
8	2.0.10.356	12/07/2018 14:12	2	16	1621982	1	2763	Set60	1620989	{ENTER}	980
8	2.0.10.356	12/07/2018 14:12	3	17	1716845	1	4075	Set90	1716141	{ENTER}	691
8	2.0.10.356	12/07/2018 14:12	3	18	1782309	1	3146	Set60	1781660	{ENTER}	635
8	2.0.10.356	12/07/2018 14:12	3	19	1908371	2	6579	Set120	1907585	{ENTER}	773
8	2.0.10.356	12/07/2018 14:12	3	20	2039460	1	3553	Set120	2036455
8	2.0.10.356	12/07/2018 14:12	3	21	2105138	3	3722	Set60	2104425	{ENTER}	707
8	2.0.10.356	12/07/2018 14:12	3	22	2200987	2	3456	Set90	2200369	{ENTER}	602
8	2.0.10.356	12/07/2018 14:12	3	23	2326770	1	2400	Set120	2326061	{ENTER}	701
8	2.0.10.356	12/07/2018 14:12	3	24	2390554	2	2335	Set60	2389854	{ENTER}	691
8	2.0.10.356	12/07/2018 14:12	4	25	2485271	1	1938	Set90	2484510	{ENTER}	747
8	2.0.10.356	12/07/2018 14:12	4	26	2548988	1	3564	Set60	2548244	{ENTER}	740
8	2.0.10.356	12/07/2018 14:12	4	27	2674664	2	3687	Set120	2674001	{ENTER}	646
8	2.0.10.356	12/07/2018 14:12	4	28	2800393	1	2309	Set120	2799800	{ENTER}	582
8	2.0.10.356	12/07/2018 14:12	4	29	2864044	3	2889	Set60	2863369	{ENTER}	668
8	2.0.10.356	12/07/2018 14:12	4	30	2959187	3	3377	Set90	2958481	{ENTER}	691
8	2.0.10.356	12/07/2018 14:12	4	31	3084609	1	3634	Set120	3084006	{ENTER}	597
8	2.0.10.356	12/07/2018 14:12	4	32	3149753	3	2241	Set60	3149063	{ENTER}	675
9	2.0.10.356	13/07/2018 07:41	1	1	235638	2	2168	Set90	234595	{ENTER}	1035
9	2.0.10.356	13/07/2018 07:41	1	2	300809	1	2036	Set60	299481	{ENTER}	1316
9	2.0.10.356	13/07/2018 07:41	1	3	426618	3	1930	Set120	425470	{ENTER}	1142
9	2.0.10.356	13/07/2018 07:41	1	4	552387	3	2432	Set120	551101	{ENTER}	1270
9	2.0.10.356	13/07/2018 07:41	1	5	617904	2	2562	Set60	616286	{ENTER}	1604
9	2.0.10.356	13/07/2018 07:41	1	6	713861	2	2172	Set90	713086	{ENTER}	763
9	2.0.10.356	13/07/2018 07:41	1	7	839176	2	2112	Set120	837811	{ENTER}	1349
9	2.0.10.356	13/07/2018 07:41	1	8	904094	2	2689	Set60	902516	{ENTER}	1571
9	2.0.10.356	13/07/2018 07:41	2	9	999197	3	3409	Set90	998468	{ENTER}	714
9	2.0.10.356	13/07/2018 07:41	2	10	1063955	1	2771	Set60	1063354	{ENTER}	596
9	2.0.10.356	13/07/2018 07:41	2	11	1189391	3	2958	Set120	1188479	{ENTER}	902
9	2.0.10.356	13/07/2018 07:41	2	12	1315386	3	2233	Set120	1314070	{ENTER}	1309
9	2.0.10.356	13/07/2018 07:41	2	13	1379250	3	2105	Set60	1378543	{ENTER}	700
9	2.0.10.356	13/07/2018 07:41	2	14	1473954	1	2032	Set90	1473175	{ENTER}	771
9	2.0.10.356	13/07/2018 07:41	2	15	1600083	1	1614	Set120	1598667	{ENTER}	1406
9	2.0.10.356	13/07/2018 07:41	2	16	1663040	3	2200	Set60	1662485	{ENTER}	547
9	2.0.10.356	13/07/2018 07:41	3	17	1757744	1	2519	Set90	1757005	{ENTER}	730
9	2.0.10.356	13/07/2018 07:41	3	18	1822248	2	2095	Set60	1821555	{ENTER}	676
9	2.0.10.356	13/07/2018 07:41	3	19	1947603	3	2298	Set120	1946248	{ENTER}	1350
9	2.0.10.356	13/07/2018 07:41	3	20	2073239	3	2189	Set120	2071815	{ENTER}	1413
9	2.0.10.356	13/07/2018 07:41	3	21	2138317	2	2231	Set60	2137064	{ENTER}	1244
9	2.0.10.356	13/07/2018 07:41	3	22	2234820	3	2551	Set90	2233104	{ENTER}	1699
9	2.0.10.356	13/07/2018 07:41	3	23	2360802	1	1896	Set120	2359996	{ENTER}	798
9	2.0.10.356	13/07/2018 07:41	3	24	2425693	1	1868	Set60	2424398	{ENTER}	1283
9	2.0.10.356	13/07/2018 07:41	4	25	2520490	2	2254	Set90	2519182	{ENTER}	1298
9	2.0.10.356	13/07/2018 07:41	4	26	2584927	2	1721	Set60	2584028	{ENTER}	884
9	2.0.10.356	13/07/2018 07:41	4	27	2709803	2	2795	Set120	2709081	{ENTER}	717
9	2.0.10.356	13/07/2018 07:41	4	28	2834932	2	1849	Set120	2833968	{ENTER}	949
9	2.0.10.356	13/07/2018 07:41	4	29	2898729	2	1884	Set60	2897625	{ENTER}	1100
9	2.0.10.356	13/07/2018 07:41	4	30	2992859	2	4113	Set90	2991929	{ENTER}	915
9	2.0.10.356	13/07/2018 07:41	4	31	3120801	2	3225	Set120	3118789	{ENTER}	2006
9	2.0.10.356	13/07/2018 07:41	4	32	3186226	2	2328	Set60	3185142	{ENTER}	1068
10	2.0.10.356	13/07/2018 11:39	1	1	124386	1	1304	Set90	123856	{ENTER}	522
10	2.0.10.356	13/07/2018 11:39	1	2	189197	2	1901	Set60	188818	{ENTER}	368
10	2.0.10.356	13/07/2018 11:39	1	3	312632	2	1761	Set120	312123	{ENTER}	502
10	2.0.10.356	13/07/2018 11:39	1	4	436335	1	1544	Set120	435514	{ENTER}	805
10	2.0.10.356	13/07/2018 11:39	1	5	498812	2	1523	Set60	498419	{ENTER}	380
10	2.0.10.356	13/07/2018 11:39	1	6	592022	3	6176	Set90	591387	{ENTER}	627
10	2.0.10.356	13/07/2018 11:39	1	7	719938	3	1707	Set120	719415	{ENTER}	510
10	2.0.10.356	13/07/2018 11:39	1	8	782522	3	4010	Set60	782145	{ENTER}	363
10	2.0.10.356	13/07/2018 11:39	2	9	878199	2	4068	Set90	877737	{ENTER}	450
10	2.0.10.356	13/07/2018 11:39	2	10	943276	2	1431	Set60	942751	{ENTER}	516
10	2.0.10.356	13/07/2018 11:39	2	11	1066459	3	2551	Set120	1065940	{ENTER}	510
10	2.0.10.356	13/07/2018 11:39	2	12	1190681	2	2031	Set120	1190219	{ENTER}	445
10	2.0.10.356	13/07/2018 11:39	2	13	1253785	2	1599	Set60	1253196	{ENTER}	580
10	2.0.10.356	13/07/2018 11:39	2	14	1347049	3	5126	Set90	1346236	{ENTER}	803
10	2.0.10.356	13/07/2018 11:39	2	15	1473751	1	1879	Set120	1473128	{ENTER}	614
10	2.0.10.356	13/07/2018 11:39	2	16	1536882	3	6643	Set60	1536130	{ENTER}	739
10	2.0.10.356	13/07/2018 11:39	3	17	1635052	3	4640	Set90	1634538	{ENTER}	506
10	2.0.10.356	13/07/2018 11:39	3	18	1700823	2	1565	Set60	1700384	{ENTER}	428
10	2.0.10.356	13/07/2018 11:39	3	19	1824338	2	4336	Set120	1823701	{ENTER}	629
10	2.0.10.356	13/07/2018 11:39	3	20	1950307	1	3342	Set120	1949772	{ENTER}	525
10	2.0.10.356	13/07/2018 11:39	3	21	2014558	1	2147	Set60	2014141	{ENTER}	412
10	2.0.10.356	13/07/2018 11:39	3	22	2108061	2	6571	Set90	2107541	{ENTER}	515
10	2.0.10.356	13/07/2018 11:39	3	23	2236283	4	3276	Set120	2235785	{ENTER}	494
10	2.0.10.356	13/07/2018 11:39	3	24	2301001	2	1757	Set60	2300106	{ENTER}	884
10	2.0.10.356	13/07/2018 11:39	4	25	2394398	1	1551	Set90	2394058	{ENTER}	331
10	2.0.10.356	13/07/2018 11:39	4	26	2457076	1	1233	Set60	2456521	{ENTER}	540
10	2.0.10.356	13/07/2018 11:39	4	27	2580524	1	1135	Set120	2580038	{ENTER}	469
10	2.0.10.356	13/07/2018 11:39	4	28	2704307	1	3231	Set120	2703469	{ENTER}	821
10	2.0.10.356	13/07/2018 11:39	4	29	2769171	3	7815	Set60	2768550	{ENTER}	604
10	2.0.10.356	13/07/2018 11:39	4	30	2868754	3	1863	Set90	2868294	{ENTER}	451
10	2.0.10.356	13/07/2018 11:39	4	31	2992816	1	3615	Set120	2991858	{ENTER}	950
10	2.0.10.356	13/07/2018 11:39	4	32	3057867	3	1060	Set60	3057435	{ENTER}	428
11	2.0.10.356	13/07/2018 14:50	1	1	140496	1	2432	Set90	139846	{ENTER}	634
11	2.0.10.356	13/07/2018 14:50	1	2	204454	2	1930	Set60	203916	{ENTER}	524
11	2.0.10.356	13/07/2018 14:50	1	3	328089	2	2918	Set120	327513	{ENTER}	566
11	2.0.10.356	13/07/2018 14:50	1	4	453098	2	5275	Set120	452336	{ENTER}	757
11	2.0.10.356	13/07/2018 14:50	1	5	519802	2	4947	Set60	519145	{ENTER}	652
11	2.0.10.356	13/07/2018 14:50	1	6	616946	2	4418	Set90	616329	{ENTER}	603
11	2.0.10.356	13/07/2018 14:50	1	7	743421	2	2742	Set120	742733	{ENTER}	678
11	2.0.10.356	13/07/2018 14:50	1	8	807539	2	4583	Set60	806967	{ENTER}	563
11	2.0.10.356	13/07/2018 14:50	2	9	904775	2	2434	Set90	904215	{ENTER}	554
11	2.0.10.356	13/07/2018 14:50	2	10	968613	2	1988	Set60	967973	{ENTER}	636
11	2.0.10.356	13/07/2018 14:50	2	11	1092889	2	1718	Set120	1092122	{ENTER}	749
11	2.0.10.356	13/07/2018 14:50	2	12	1216964	2	1762	Set120	1216121	{ENTER}	829
11	2.0.10.356	13/07/2018 14:50	2	13	1280308	2	3154	Set60	1279490	{ENTER}	812
11	2.0.10.356	13/07/2018 14:50	2	14	1376092	2	1969	Set90	1375234	{ENTER}	843
11	2.0.10.356	13/07/2018 14:50	2	15	1500394	1	2546	Set120	1499870	{ENTER}	510
11	2.0.10.356	13/07/2018 14:50	2	16	1564458	4	6505	Set60	1563855	{ENTER}	588
11	2.0.10.356	13/07/2018 14:50	3	17	1663468	2	3166	Set90	1662759	{ENTER}	699
11	2.0.10.356	13/07/2018 14:50	3	18	1728639	3	3842	Set60	1727822	{ENTER}	811
11	2.0.10.356	13/07/2018 14:50	3	19	1854555	2	1453	Set120	1853939	{ENTER}	605
11	2.0.10.356	13/07/2018 14:50	3	20	1978390	2	2425	Set120	1977698	{ENTER}	685
11	2.0.10.356	13/07/2018 14:50	3	21	2042308	2	2299	Set60	2041667	{ENTER}	636
11	2.0.10.356	13/07/2018 14:50	3	22	2136558	2	2408	Set90	2136011	{ENTER}	531
11	2.0.10.356	13/07/2018 14:50	3	23	2261313	2	1955	Set120	2260639	{ENTER}	661
11	2.0.10.356	13/07/2018 14:50	3	24	2324858	2	3330	Set60	2324256	{ENTER}	596
11	2.0.10.356	13/07/2018 14:50	4	25	2420588	2	1943	Set90	2419912	{ENTER}	667
11	2.0.10.356	13/07/2018 14:50	4	26	2484385	2	5465	Set60	2483623	{ENTER}	747
11	2.0.10.356	13/07/2018 14:50	4	27	2612114	1	2047	Set120	2611380	{ENTER}	725
11	2.0.10.356	13/07/2018 14:50	4	28	2736510	2	6010	Set120	2735851	{ENTER}	645
11	2.0.10.356	13/07/2018 14:50	4	29	2804054	2	1889	Set60	2803460	{ENTER}	587
11	2.0.10.356	13/07/2018 14:50	4	30	2898184	2	2023	Set90	2897388	{ENTER}	787
11	2.0.10.356	13/07/2018 14:50	4	31	3022233	2	1604	Set120	3021576	{ENTER}	645
11	2.0.10.356	13/07/2018 14:50	4	32	3086017	2	4244	Set60	3085041	{ENTER}	972
12	2.0.10.356	16/07/2018 07:54	1	1	112548	1	2604	Set90	111925	{ENTER}	611
12	2.0.10.356	16/07/2018 07:54	1	2	176599	3	5008	Set60	175924	{ENTER}	667
12	2.0.10.356	16/07/2018 07:54	1	3	303474	2	4084	Set120	302825	{ENTER}	645
12	2.0.10.356	16/07/2018 07:54	1	4	429550	3	3695	Set120	429071	{ENTER}	462
12	2.0.10.356	16/07/2018 07:54	1	5	494481	3	3123	Set60	494009	{ENTER}	467
12	2.0.10.356	16/07/2018 07:54	1	6	589651	3	2336	Set90	588833	{ENTER}	802
12	2.0.10.356	16/07/2018 07:54	1	7	714433	3	2473	Set120	713717	{ENTER}	709
12	2.0.10.356	16/07/2018 07:54	1	8	778257	2	5632	Set60	777574	{ENTER}	675
12	2.0.10.356	16/07/2018 07:54	2	9	877960	3	6264	Set90	875534	{ENTER}	2419
12	2.0.10.356	16/07/2018 07:54	2	10	945691	2	2789	Set60	945180	{ENTER}	500
12	2.0.10.356	16/07/2018 07:54	2	11	1072887	3	7184	Set120	1072246	{ENTER}	633
12	2.0.10.356	16/07/2018 07:54	2	12	1202935	1	4838	Set120	1201576	{ENTER}	1349
12	2.0.10.356	16/07/2018 07:54	2	13	1270013	1	4016	Set60	1269481	{ENTER}	524
12	2.0.10.356	16/07/2018 07:54	2	14	1366916	3	7368	Set90	1365897	{ENTER}	1011
12	2.0.10.356	16/07/2018 07:54	2	15	1498858	3	2889	Set120	1498106	{ENTER}	745
12	2.0.10.356	16/07/2018 07:54	2	16	1564363	3	2383	Set60	1563623	{ENTER}	731
12	2.0.10.356	16/07/2018 07:54	3	17	1659266	1	5727	Set90	1658279	{ENTER}	970
12	2.0.10.356	16/07/2018 07:54	3	18	1726303	1	15505	Set60	1725781	{ENTER}	516
12	2.0.10.356	16/07/2018 07:54	3	19	1863672	1	2719	Set120	1863018	{ENTER}	645
12	2.0.10.356	16/07/2018 07:54	3	20	1989867	3	3107	Set120	1988601	{ENTER}	1253
12	2.0.10.356	16/07/2018 07:54	3	21	2054478	2	2807	Set60	2053770	{ENTER}	692
12	2.0.10.356	16/07/2018 07:54	3	22	2154941	2	3743	Set90	2153294	{ENTER}	1631
12	2.0.10.356	16/07/2018 07:54	3	23	2282603	2	4568	Set120	2281382	{ENTER}	1205
12	2.0.10.356	16/07/2018 07:54	3	24	2350388	3	4495	Set60	2349463	{ENTER}	916
12	2.0.10.356	16/07/2018 07:54	4	25	2451411	2	3807	Set90	2448783	{ENTER}	2619
12	2.0.10.356	16/07/2018 07:54	4	26	2517902	2	6539	Set60	2516230	{ENTER}	1667
12	2.0.10.356	16/07/2018 07:54	4	27	2649057	3	4143	Set120	2648411	{ENTER}	637
12	2.0.10.356	16/07/2018 07:54	4	28	2778692	2	6171	Set120	2776185	{ENTER}	2494
12	2.0.10.356	16/07/2018 07:54	4	29	2848757	2	3633	Set60	2847227	{ENTER}	1515
12	2.0.10.356	16/07/2018 07:54	4	30	2948526	3	3039	Set90	2945851	{ENTER}	2666
12	2.0.10.356	16/07/2018 07:54	4	31	3077108	1	2896	Set120	3075503	{ENTER}	1597
12	2.0.10.356	16/07/2018 07:54	4	32	3144293	3	2686	Set60	3142248	{ENTER}	2027
13	2.0.10.356	16/07/2018 12:05	1	1	177064	1	6101	Set90	175994	{ENTER}	1059
13	2.0.10.356	16/07/2018 12:05	1	2	249288	1	6140	Set60	246281
13	2.0.10.356	16/07/2018 12:05	1	3	377963	3	11280	Set120	377326	{ENTER}	621
13	2.0.10.356	16/07/2018 12:05	1	4	511879	3	4411	Set120	510636	{ENTER}	1238
13	2.0.10.356	16/07/2018 12:05	1	5	579703	3	3546	Set60	579029	{ENTER}	660
13	2.0.10.356	16/07/2018 12:05	1	6	677953	2	7639	Set90	674949
13	2.0.10.356	16/07/2018 12:05	1	7	809108	3	7923	Set120	807946	{ENTER}	1149
13	2.0.10.356	16/07/2018 12:05	1	8	878532	3	2482	Set60	877899	{ENTER}	619
13	2.0.10.356	16/07/2018 12:05	2	9	974902	3	2359	Set90	973819	{ENTER}	1074
13	2.0.10.356	16/07/2018 12:05	2	10	1039180	3	2361	Set60	1038097	{ENTER}	1076
13	2.0.10.356	16/07/2018 12:05	2	11	1166015	3	3421	Set120	1165254	{ENTER}	750
13	2.0.10.356	16/07/2018 12:05	2	12	1292011	3	5975	Set120	1290821	{ENTER}	1173
13	2.0.10.356	16/07/2018 12:05	2	13	1362048	3	7914	Set60	1360438	{ENTER}	1596
13	2.0.10.356	16/07/2018 12:05	2	14	1461898	3	4311	Set90	1461278	{ENTER}	611
13	2.0.10.356	16/07/2018 12:05	2	15	1590453	1	3507	Set120	1589746	{ENTER}	694
13	2.0.10.356	16/07/2018 12:05	2	16	1655224	3	2263	Set60	1654683	{ENTER}	524
13	2.0.10.356	16/07/2018 12:05	3	17	1749354	3	2556	Set90	1748875	{ENTER}	475
13	2.0.10.356	16/07/2018 12:05	3	18	1815499	3	4682	Set60	1814967	{ENTER}	518
13	2.0.10.356	16/07/2018 12:05	3	19	1943427	3	2377	Set120	1942343	{ENTER}	1077
13	2.0.10.356	16/07/2018 12:05	3	20	2067610	2	5161	Set120	2066926	{ENTER}	677
13	2.0.10.356	16/07/2018 12:05	3	21	2134967	2	5771	Set60	2133791	{ENTER}	1171
13	2.0.10.356	16/07/2018 12:05	3	22	2232990	3	3932	Set90	2232175	{ENTER}	811
13	2.0.10.356	16/07/2018 12:05	3	23	2359173	3	2435	Set120	2358339	{ENTER}	829
13	2.0.10.356	16/07/2018 12:05	3	24	2423970	1	3110	Set60	2422556	{ENTER}	1404
13	2.0.10.356	16/07/2018 12:05	4	25	2519207	3	2672	Set90	2518628	{ENTER}	563
13	2.0.10.356	16/07/2018 12:05	4	26	2583871	3	1911	Set60	2583171	{ENTER}	691
13	2.0.10.356	16/07/2018 12:05	4	27	2708693	1	4672	Set120	2707712	{ENTER}	973
13	2.0.10.356	16/07/2018 12:05	4	28	2838315	3	2905	Set120	2837727	{ENTER}	581
13	2.0.10.356	16/07/2018 12:05	4	29	2902940	2	5695	Set60	2902152	{ENTER}	771
13	2.0.10.356	16/07/2018 12:05	4	30	3000990	3	4660	Set90	3000376	{ENTER}	602
13	2.0.10.356	16/07/2018 12:05	4	31	3130505	3	5128	Set120	3127508
13	2.0.10.356	16/07/2018 12:05	4	32	3197916	3	3236	Set60	3196677	{ENTER}	1228
14	2.0.10.356	16/07/2018 15:07	1	1	245380	2	1476	Set90	244918	{ENTER}	450
14	2.0.10.356	16/07/2018 15:07	1	2	308058	2	2238	Set60	307676	{ENTER}	372
14	2.0.10.356	16/07/2018 15:07	1	3	431653	3	2018	Set120	431241	{ENTER}	406
14	2.0.10.356	16/07/2018 15:07	1	4	555236	4	2506	Set120	554648	{ENTER}	574
14	2.0.10.356	16/07/2018 15:07	1	5	618540	3	2041	Set60	618193	{ENTER}	340
14	2.0.10.356	16/07/2018 15:07	1	6	712110	4	2966	Set90	711609	{ENTER}	491
14	2.0.10.356	16/07/2018 15:07	1	7	836479	3	1804	Set120	835958	{ENTER}	509
14	2.0.10.356	16/07/2018 15:07	1	8	899250	3	1384	Set60	898775	{ENTER}	459
14	2.0.10.356	16/07/2018 15:07	2	9	992140	3	1557	Set90	991679	{ENTER}	451
14	2.0.10.356	16/07/2018 15:07	2	10	1055751	4	1930	Set60	1054357	{ENTER}	1380
14	2.0.10.356	16/07/2018 15:07	2	11	1179080	3	1896	Set120	1178658	{ENTER}	414
14	2.0.10.356	16/07/2018 15:07	2	12	1302556	3	2139	Set120	1302129	{ENTER}	414
14	2.0.10.356	16/07/2018 15:07	2	13	1365673	2	1973	Set60	1365170	{ENTER}	492
14	2.0.10.356	16/07/2018 15:07	2	14	1459417	3	1628	Set90	1458914	{ENTER}	491
14	2.0.10.356	16/07/2018 15:07	2	15	1583252	1	1968	Set120	1582023	{ENTER}	1221
14	2.0.10.356	16/07/2018 15:07	2	16	1646757	3	1566	Set60	1646232	{ENTER}	515
14	2.0.10.356	16/07/2018 15:07	3	17	1739953	4	1105	Set90	1739504	{ENTER}	435
14	2.0.10.356	16/07/2018 15:07	3	18	1802311	1	1603	Set60	1801550	{ENTER}	748
14	2.0.10.356	16/07/2018 15:07	3	19	1925213	1	1348	Set120	1924803	{ENTER}	406
14	2.0.10.356	16/07/2018 15:07	3	20	2048142	3	1778	Set120	2047674	{ENTER}	462
14	2.0.10.356	16/07/2018 15:07	3	21	2110927	3	2968	Set60	2110483	{ENTER}	436
14	2.0.10.356	16/07/2018 15:07	3	22	2205683	3	1611	Set90	2204867	{ENTER}	803
14	2.0.10.356	16/07/2018 15:07	3	23	2328879	3	2894	Set120	2328336	{ENTER}	533
14	2.0.10.356	16/07/2018 15:07	3	24	2392903	3	1165	Set60	2392433	{ENTER}	459
14	2.0.10.356	16/07/2018 15:07	4	25	2485567	2	2101	Set90	2485089	{ENTER}	467
14	2.0.10.356	16/07/2018 15:07	4	26	2550418	1	1633	Set60	2548183	{ENTER}	2228
14	2.0.10.356	16/07/2018 15:07	4	27	2673813	1	1389	Set120	2673100	{ENTER}	702
14	2.0.10.356	16/07/2018 15:07	4	28	2797009	3	1864	Set120	2796187	{ENTER}	806
14	2.0.10.356	16/07/2018 15:07	4	29	2859967	3	1577	Set60	2859476	{ENTER}	476
14	2.0.10.356	16/07/2018 15:07	4	30	2953070	4	1457	Set90	2952676	{ENTER}	387
14	2.0.10.356	16/07/2018 15:07	4	31	3076119	3	1895	Set120	3075617	{ENTER}	485
14	2.0.10.356	16/07/2018 15:07	4	32	3139317	3	1632	Set60	3138570	{ENTER}	739
15	2.0.10.356	17/07/2018 08:08	1	1	299256	1	1567	Set90	298404	{ENTER}	835
15	2.0.10.356	17/07/2018 08:08	1	2	362614	2	1960	Set60	361787	{ENTER}	819
15	2.0.10.356	17/07/2018 08:08	1	3	487596	1	1281	Set120	486696	{ENTER}	885
15	2.0.10.356	17/07/2018 08:08	1	4	611645	1	1703	Set120	610703	{ENTER}	933
15	2.0.10.356	17/07/2018 08:08	1	5	675069	1	886	Set60	674352	{ENTER}	707
15	2.0.10.356	17/07/2018 08:08	1	6	768479	2	1835	Set90	767384	{ENTER}	1090
15	2.0.10.356	17/07/2018 08:08	1	7	892808	1	1081	Set120	891980	{ENTER}	813
15	2.0.10.356	17/07/2018 08:08	1	8	955193	3	1328	Set60	954597	{ENTER}	588
15	2.0.10.356	17/07/2018 08:08	2	9	1048616	1	2384	Set90	1047941	{ENTER}	667
15	2.0.10.356	17/07/2018 08:08	2	10	1113000	1	1839	Set60	1111924	{ENTER}	1059
15	2.0.10.356	17/07/2018 08:08	2	11	1238982	2	1632	Set120	1237393	{ENTER}	1573
15	2.0.10.356	17/07/2018 08:08	2	12	1363605	1	3752	Set120	1362816	{ENTER}	773
15	2.0.10.356	17/07/2018 08:08	2	13	1431576	1	1188	Set60	1430392	{ENTER}	1172
15	2.0.10.356	17/07/2018 08:08	2	14	1527679	2	1796	Set90	1524681
15	2.0.10.356	17/07/2018 08:08	2	15	1654621	2	2773	Set120	1651621
15	2.0.10.356	17/07/2018 08:08	2	16	1719072	1	1689	Set60	1718230	{ENTER}	828
15	2.0.10.356	17/07/2018 08:08	3	17	1814922	1	1223	Set90	1813526	{ENTER}	1387
15	2.0.10.356	17/07/2018 08:08	3	18	1877773	1	779	Set60	1877029	{ENTER}	731
15	2.0.10.356	17/07/2018 08:08	3	19	2000822	1	1009	Set120	2000098	{ENTER}	717
15	2.0.10.356	17/07/2018 08:08	3	20	2124431	1	1015	Set120	2123440	{ENTER}	982
15	2.0.10.356	17/07/2018 08:08	3	21	2188202	2	1283	Set60	2186370	{ENTER}	1827
15	2.0.10.356	17/07/2018 08:08	3	22	2282359	2	1549	Set90	2281466	{ENTER}	882
15	2.0.10.356	17/07/2018 08:08	3	23	2409607	2	2324	Set120	2406606
15	2.0.10.356	17/07/2018 08:08	3	24	2473752	1	1234	Set60	2472735	{ENTER}	1003
15	2.0.10.356	17/07/2018 08:08	4	25	2568322	2	1528	Set90	2567279	{ENTER}	1035
15	2.0.10.356	17/07/2018 08:08	4	26	2632346	1	623	Set60	2631438	{ENTER}	899
15	2.0.10.356	17/07/2018 08:08	4	27	2757075	2	1077	Set120	2755586	{ENTER}	1478
15	2.0.10.356	17/07/2018 08:08	4	28	2882950	1	1657	Set120	2879953
15	2.0.10.356	17/07/2018 08:08	4	29	2948441	2	1677	Set60	2947050	{ENTER}	1380
15	2.0.10.356	17/07/2018 08:08	4	30	3045025	1	780	Set90	3044143	{ENTER}	870
15	2.0.10.356	17/07/2018 08:08	4	31	3168940	2	1400	Set120	3167935	{ENTER}	997
15	2.0.10.356	17/07/2018 08:08	4	32	3233005	1	1302	Set60	3231680	{ENTER}	1307
16	2.0.10.356	17/07/2018 11:50	1	1	205604	1	1404	Set90	205141	{ENTER}	459
16	2.0.10.356	17/07/2018 11:50	1	2	268416	2	2119	Set60	267860	{ENTER}	539
16	2.0.10.356	17/07/2018 11:50	1	3	392371	2	3171	Set120	391625	{ENTER}	733
16	2.0.10.356	17/07/2018 11:50	1	4	517353	3	1036	Set120	516784	{ENTER}	565
16	2.0.10.356	17/07/2018 11:50	1	5	579391	3	1653	Set60	579057	{ENTER}	323
16	2.0.10.356	17/07/2018 11:50	1	6	672548	3	1424	Set90	672153	{ENTER}	379
16	2.0.10.356	17/07/2018 11:50	1	7	795903	3	1307	Set120	795173	{ENTER}	725
16	2.0.10.356	17/07/2018 11:50	1	8	858341	2	1437	Set60	857798	{ENTER}	532
16	2.0.10.356	17/07/2018 11:50	2	9	951591	3	1498	Set90	950934	{ENTER}	651
16	2.0.10.356	17/07/2018 11:50	2	10	1014416	1	2208	Set60	1013813	{ENTER}	595
16	2.0.10.356	17/07/2018 11:50	2	11	1138424	2	1303	Set120	1137794	{ENTER}	613
16	2.0.10.356	17/07/2018 11:50	2	12	1261620	2	1186	Set120	1261097	{ENTER}	517
16	2.0.10.356	17/07/2018 11:50	2	13	1324165	2	1096	Set60	1323466	{ENTER}	683
16	2.0.10.356	17/07/2018 11:50	2	14	1417228	3	2081	Set90	1416410	{ENTER}	811
16	2.0.10.356	17/07/2018 11:50	2	15	1541583	2	1708	Set120	1540310	{ENTER}	1261
16	2.0.10.356	17/07/2018 11:50	2	16	1604768	3	1995	Set60	1603975	{ENTER}	780
16	2.0.10.356	17/07/2018 11:50	3	17	1699524	3	1582	Set90	1698799	{ENTER}	715
16	2.0.10.356	17/07/2018 11:50	3	18	1762469	2	1820	Set60	1761718	{ENTER}	739
16	2.0.10.356	17/07/2018 11:50	3	19	1886318	2	1610	Set120	1885411	{ENTER}	893
16	2.0.10.356	17/07/2018 11:50	3	20	2009887	4	1192	Set120	2009242	{ENTER}	629
16	2.0.10.356	17/07/2018 11:50	3	21	2072151	3	1327	Set60	2071603	{ENTER}	531
16	2.0.10.356	17/07/2018 11:50	3	22	2165628	2	1434	Set90	2164731	{ENTER}	891
16	2.0.10.356	17/07/2018 11:50	3	23	2288837	2	1359	Set120	2288287	{ENTER}	541
16	2.0.10.356	17/07/2018 11:50	3	24	2351394	2	1562	Set60	2350864	{ENTER}	524
16	2.0.10.356	17/07/2018 11:50	4	25	2444498	3	1737	Set90	2443920	{ENTER}	563
16	2.0.10.356	17/07/2018 11:50	4	26	2507642	2	1408	Set60	2506783	{ENTER}	851
16	2.0.10.356	17/07/2018 11:50	4	27	2630931	2	1350	Set120	2630252	{ENTER}	669
16	2.0.10.356	17/07/2018 11:50	4	28	2754167	3	2273	Set120	2753531	{ENTER}	621
16	2.0.10.356	17/07/2018 11:50	4	29	2817844	3	1331	Set60	2817028	{ENTER}	803
16	2.0.10.356	17/07/2018 11:50	4	30	2910975	3	1680	Set90	2910356	{ENTER}	603
16	2.0.10.356	17/07/2018 11:50	4	31	3034850	3	1387	Set120	3034248	{ENTER}	589
16	2.0.10.356	17/07/2018 11:50	4	32	3097848	2	1101	Set60	3097529	{ENTER}	308
17	2.0.10.356	17/07/2018 15:48	1	1	149820	1	3587	Set90	149220	{ENTER}	595
17	2.0.10.356	17/07/2018 15:48	1	2	214711	2	3119	Set60	214099	{ENTER}	603
17	2.0.10.356	17/07/2018 15:48	1	3	339533	2	3808	Set120	338944	{ENTER}	573
17	2.0.10.356	17/07/2018 15:48	1	4	465115	1	4153	Set120	464479	{ENTER}	629
17	2.0.10.356	17/07/2018 15:48	1	5	530553	2	2354	Set60	529952	{ENTER}	587
17	2.0.10.356	17/07/2018 15:48	1	6	626923	2	2399	Set90	626312	{ENTER}	594
17	2.0.10.356	17/07/2018 15:48	1	7	750999	3	2602	Set120	750460	{ENTER}	525
17	2.0.10.356	17/07/2018 15:48	1	8	814690	2	2455	Set60	814117	{ENTER}	556
17	2.0.10.356	17/07/2018 15:48	2	9	909273	3	2431	Set90	908693	{ENTER}	563
17	2.0.10.356	17/07/2018 15:48	2	10	973044	3	3411	Set60	972492	{ENTER}	547
17	2.0.10.356	17/07/2018 15:48	2	11	1098213	2	3009	Set120	1097585	{ENTER}	613
17	2.0.10.356	17/07/2018 15:48	2	12	1222995	3	1890	Set120	1222439	{ENTER}	550
17	2.0.10.356	17/07/2018 15:48	2	13	1286526	3	1830	Set60	1285969	{ENTER}	547
17	2.0.10.356	17/07/2018 15:48	2	14	1380043	3	1504	Set90	1379385	{ENTER}	642
17	2.0.10.356	17/07/2018 15:48	2	15	1503358	2	3996	Set120	1502773	{ENTER}	581
17	2.0.10.356	17/07/2018 15:48	2	16	1568703	3	2107	Set60	1567958	{ENTER}	732
17	2.0.10.356	17/07/2018 15:48	3	17	1662673	3	1832	Set90	1662094	{ENTER}	563
17	2.0.10.356	17/07/2018 15:48	3	18	1725497	3	1807	Set60	1725053	{ENTER}	435
17	2.0.10.356	17/07/2018 15:48	3	19	1849079	3	1856	Set120	1848490	{ENTER}	573
17	2.0.10.356	17/07/2018 15:48	3	20	1972688	2	3758	Set120	1972096	{ENTER}	582
17	2.0.10.356	17/07/2018 15:48	3	21	2038126	1	2175	Set60	2037274	{ENTER}	843
17	2.0.10.356	17/07/2018 15:48	3	22	2132082	2	3410	Set90	2131634	{ENTER}	434
17	2.0.10.356	17/07/2018 15:48	3	23	2257478	2	1805	Set120	2256878	{ENTER}	589
17	2.0.10.356	17/07/2018 15:48	3	24	2320756	3	2295	Set60	2319991	{ENTER}	756
17	2.0.10.356	17/07/2018 15:48	4	25	2415232	3	1642	Set90	2414543	{ENTER}	675
17	2.0.10.356	17/07/2018 15:48	4	26	2479883	3	2910	Set60	2479157	{ENTER}	716
17	2.0.10.356	17/07/2018 15:48	4	27	2604759	3	2193	Set120	2604011	{ENTER}	733
17	2.0.10.356	17/07/2018 15:48	4	28	2729808	1	1895	Set120	2728897	{ENTER}	902
17	2.0.10.356	17/07/2018 15:48	4	29	2792859	3	2035	Set60	2792427	{ENTER}	419
17	2.0.10.356	17/07/2018 15:48	4	30	2886789	2	2152	Set90	2886235	{ENTER}	538
17	2.0.10.356	17/07/2018 15:48	4	31	3010731	3	1257	Set120	3010199	{ENTER}	517
17	2.0.10.356	17/07/2018 15:48	4	32	3073182	3	2205	Set60	3072672	{ENTER}	500
18	2.0.10.356	18/07/2018 12:26	1	1	160204	1	2326	Set90	159431	{ENTER}	763
18	2.0.10.356	18/07/2018 12:26	1	2	223801	3	3184	Set60	223206	{ENTER}	587
18	2.0.10.356	18/07/2018 12:26	1	3	349157	3	3611	Set120	348515	{ENTER}	629
18	2.0.10.356	18/07/2018 12:26	1	4	474686	2	4457	Set120	474073	{ENTER}	606
18	2.0.10.356	18/07/2018 12:26	1	5	540590	3	3888	Set60	539899	{ENTER}	675
18	2.0.10.356	18/07/2018 12:26	1	6	638920	2	2877	Set90	638287	{ENTER}	622
18	2.0.10.356	18/07/2018 12:26	1	7	763849	3	3531	Set120	763239	{ENTER}	605
18	2.0.10.356	18/07/2018 12:26	1	8	829260	3	2511	Set60	828496	{ENTER}	755
18	2.0.10.356	18/07/2018 12:26	2	9	924003	2	3272	Set90	923176	{ENTER}	819
18	2.0.10.356	18/07/2018 12:26	2	10	988561	2	2857	Set60	987951	{ENTER}	603
18	2.0.10.356	18/07/2018 12:26	2	11	1113703	1	2354	Set120	1112987	{ENTER}	702
18	2.0.10.356	18/07/2018 12:26	2	12	1238218	3	2766	Set120	1237466	{ENTER}	742
18	2.0.10.356	18/07/2018 12:26	2	13	1302736	3	1831	Set60	1301892	{ENTER}	827
18	2.0.10.356	18/07/2018 12:26	2	14	1397159	2	2823	Set90	1396267	{ENTER}	883
18	2.0.10.356	18/07/2018 12:26	2	15	1524462	3	3711	Set120	1521456
18	2.0.10.356	18/07/2018 12:26	2	16	1590099	2	7705	Set60	1589081	{ENTER}	1011
18	2.0.10.356	18/07/2018 12:26	3	17	1690669	3	2358	Set90	1689689	{ENTER}	970
18	2.0.10.356	18/07/2018 12:26	3	18	1754440	1	2387	Set60	1753735	{ENTER}	692
18	2.0.10.356	18/07/2018 12:26	3	19	1879156	1	2726	Set120	1878572	{ENTER}	574
18	2.0.10.356	18/07/2018 12:26	3	20	2003951	2	2529	Set120	2003187	{ENTER}	749
18	2.0.10.356	18/07/2018 12:26	3	21	2068869	2	3235	Set60	2068100	{ENTER}	764
18	2.0.10.356	18/07/2018 12:26	3	22	2164599	4	3968	Set90	2163844	{ENTER}	747
18	2.0.10.356	18/07/2018 12:26	3	23	2291074	3	2124	Set120	2290336	{ENTER}	734
18	2.0.10.356	18/07/2018 12:26	3	24	2354979	3	2274	Set60	2354138	{ENTER}	827
18	2.0.10.356	18/07/2018 12:26	4	25	2449869	3	1431	Set90	2448882	{ENTER}	970
18	2.0.10.356	18/07/2018 12:26	4	26	2516133	1	3535	Set60	2514333	{ENTER}	1783
18	2.0.10.356	18/07/2018 12:26	4	27	2642422	3	3020	Set120	2641277	{ENTER}	1133
18	2.0.10.356	18/07/2018 12:26	4	28	2767911	2	1714	Set120	2767212	{ENTER}	693
18	2.0.10.356	18/07/2018 12:26	4	29	2832162	2	1943	Set60	2830797	{ENTER}	1348
18	2.0.10.356	18/07/2018 12:26	4	30	2926465	3	1543	Set90	2925565	{ENTER}	883
18	2.0.10.356	18/07/2018 12:26	4	31	3050674	3	1573	Set120	3049761	{ENTER}	902
18	2.0.10.356	18/07/2018 12:26	4	32	3113792	1	3014	Set60	3112955	{ENTER}	827
